# Supplementary material for: Persistent C‐peptide is associated with reduced hypoglycaemia but not HbA1c in adults with longstanding Type 1 diabetes: evidence for lack of intensive treatment in UK clinical practice?
Source: PubMed Central journal article supplement (PMC6790586; doi:10.1111/dme.13960), 2019-06-27

**Table S1** – Hypoglycaemia analysis cohort characteristics. Values reported as n (%) or median (IQR). *p* values are Mann Whitney U unless otherwise stated, \* denotes Chi<sup>2</sup>.

| <b>Characteristics</b>                         | <b>Low C-peptide</b> | <b>Preserved C-peptide</b> | <b><i>p</i> value</b> |
|------------------------------------------------|----------------------|----------------------------|-----------------------|
| <b>No. of participants</b>                     | 121                  | 39                         | -                     |
| <b>No. Male (%)</b>                            | 69 (57)              | 17 (44)                    | 0.1*                  |
| <b>Age at diagnosis (years)</b>                | 5.7 (2.9, 10.8)      | 15.0 (12.2, 24.0)          | <0.0001               |
| <b>Age at recruitment (years)</b>              | 18.4 (13.5, 34.5)    | 29.3 (20.4, 43.0)          | 0.0004                |
| <b>BMI (kg/m<sup>2</sup>)</b>                  | 23.3 (19.6, 26.2)    | 24.5 (22.1, 27.4)          | 0.02                  |
| <b>BMI standard deviation score</b>            | 0.9 (0.1, 1.4)       | 0.8 (0.3, 1.5)             | 0.8                   |
| <b>Duration of diabetes (years)</b>            | 12.6 (8.3, 20.8)     | 12.1 (7.5, 21.4)           | 0.4                   |
| <b>C-peptide (pmol/l)</b>                      | <3 (<3, <3)          | 108 (37, 208)              | <0.0001               |
| <b>HbA1c (mmol/mol)</b>                        | 67 (57, 75)          | 68 (59, 80)                | 0.4                   |
| <b>HbA1c (%)</b>                               | 8.3 (7.4, 9.0)       | 8.4 (7.5, 9.5)             | 0.4                   |
| <b>Insulin dose in 24 h (U/kg)</b>             | 0.80 (0.67, 0.95)    | 0.71 (0.55, 0.94)          | 0.09                  |
| <b>No. in hypoglycaemia awareness analysis</b> | 113                  | 38                         | -                     |

**Fig. S1** – Hypoglycaemia rates by C-peptide group. Number of hypoglycaemic (blood glucose <3.5mmol/l) episodes per month stratified by aware and unaware episodes. Rates derived from Clarke's questions 5 and 6. Low C-peptide group in blue (aware n=120, unaware n=119) and preserved C-peptide group in orange (n=39). \*\*\*p≤0.001 for low vs preserved C-peptide. Error bars represent 95% CI.

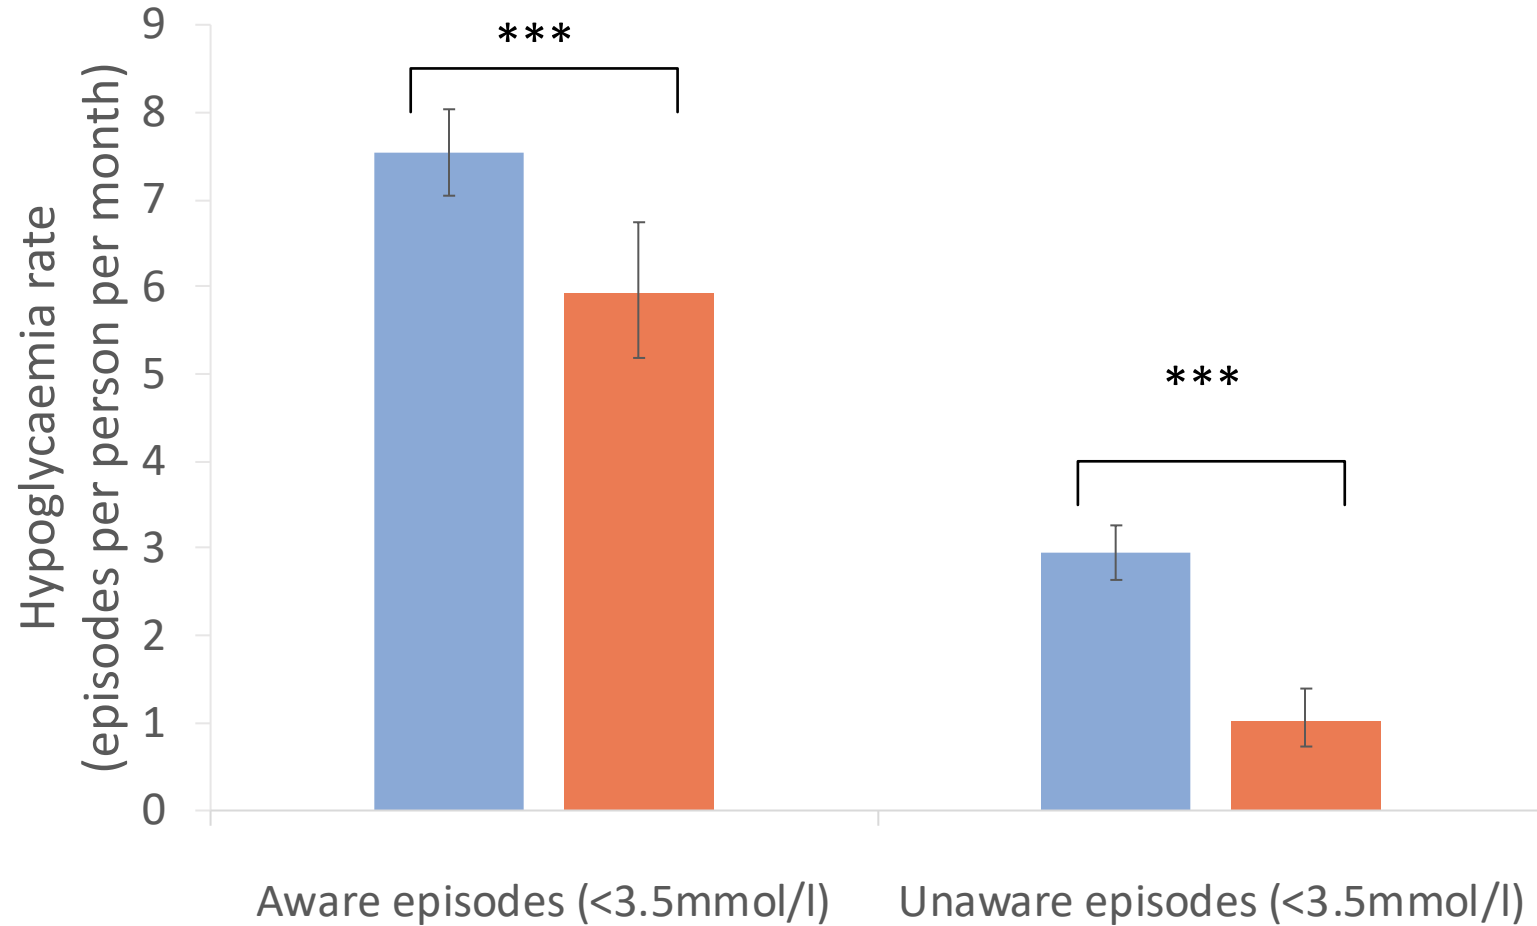

**Fig. S2** – Reduced hypoglycaemic awareness by C-peptide group. Proportion of the low (blue, n=113) or preserved (orange, n=38) C-peptide group with reduced hypoglycaemic awareness, defined as a Clarke score >4/7. Hypoglycaemic awareness was similar in both groups, p=0.5.

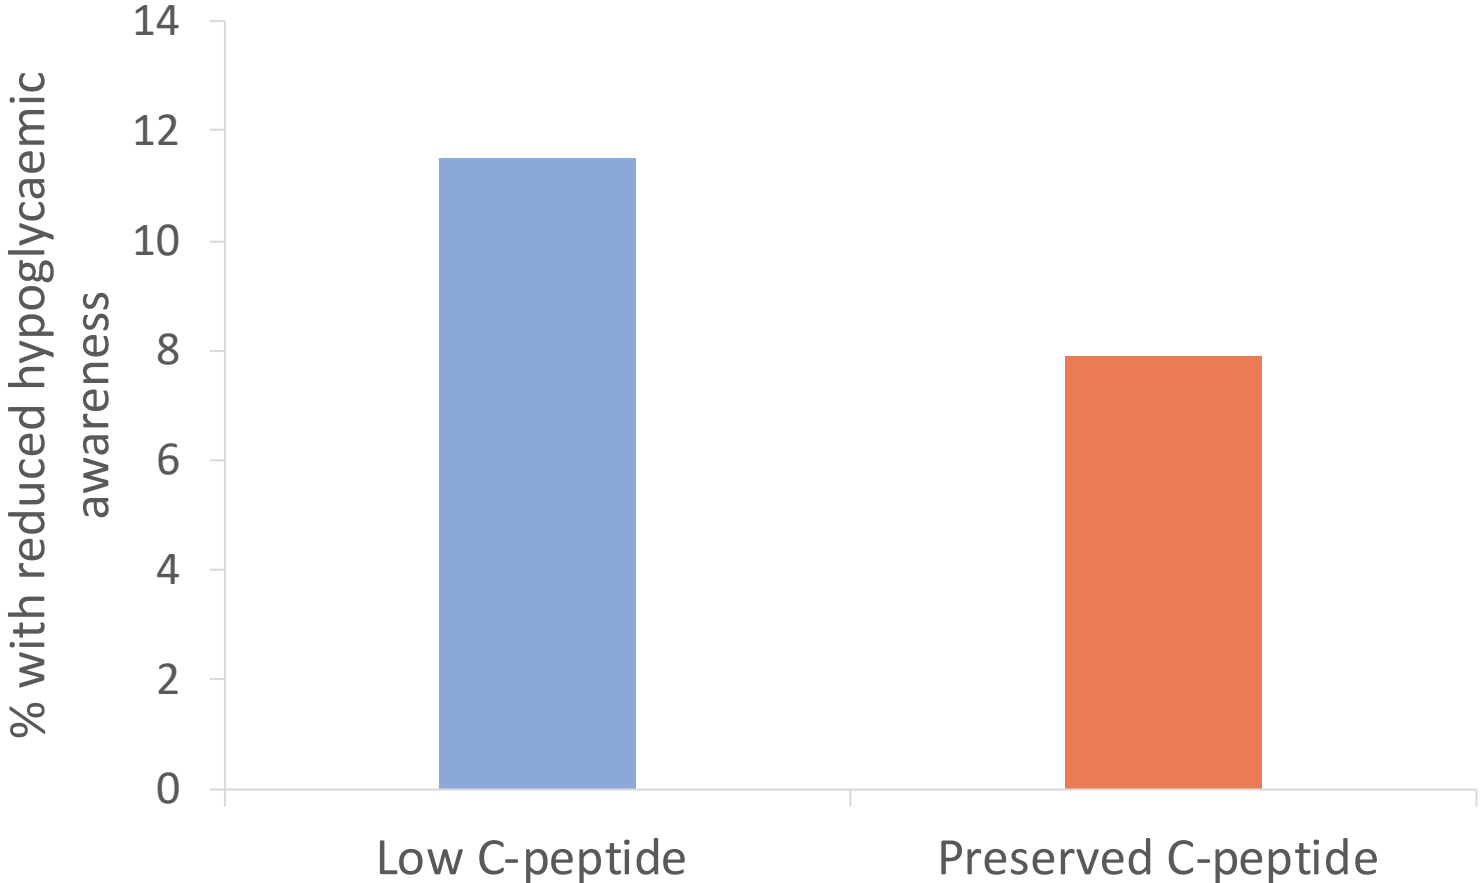

**Fig. S3** – Boxplot of study visit HbA1c by C-peptide group. Study visit HbA1c was similar in the low (n=148) and preserved (n=70) C-peptide groups p=0.06. Including outliers.

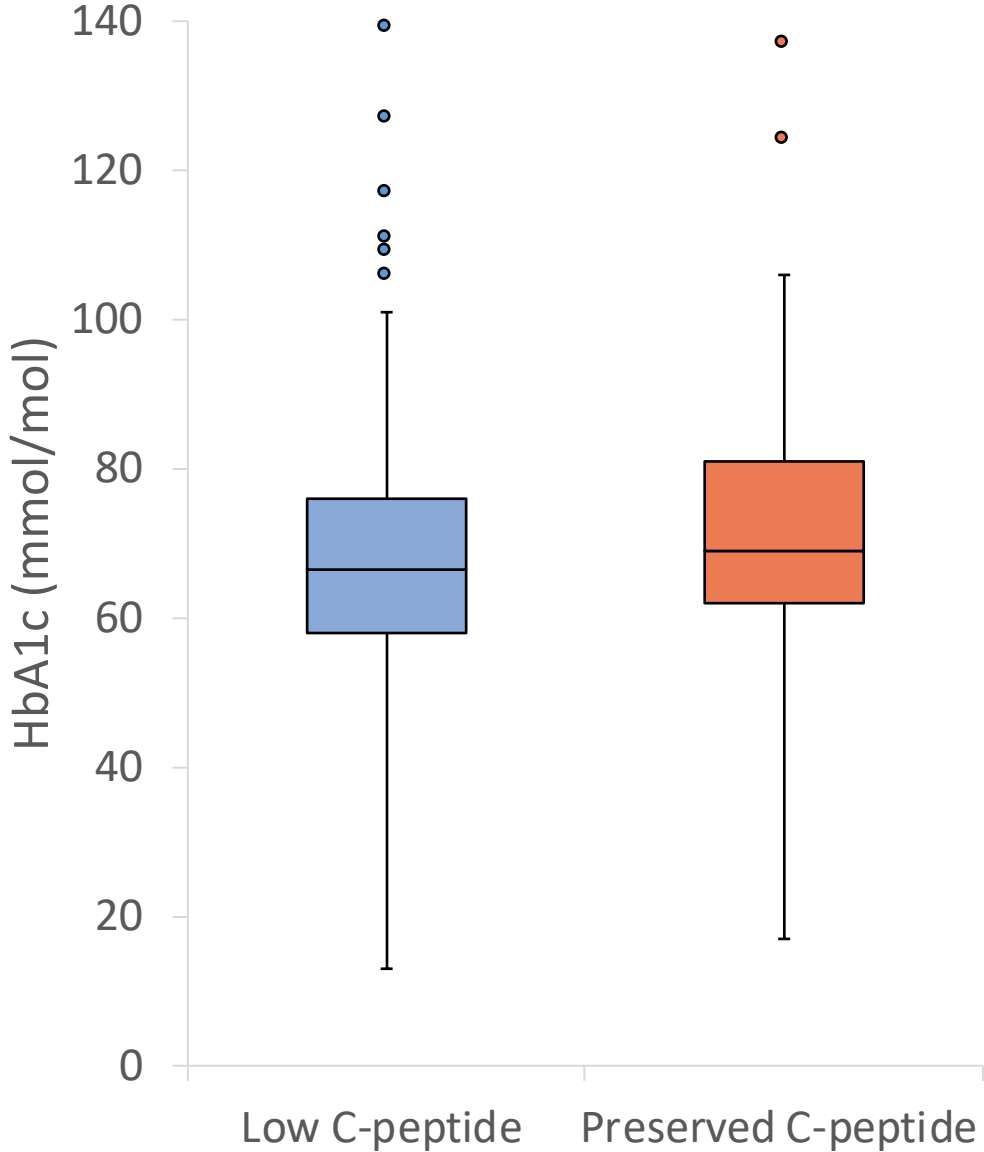

**Fig. S4** - Historic HbA1c mean analysis **(a)** Boxplot showing similar historic HbA1c mean in low (n=86) vs preserved (n=67) C-peptide group, p=0.4. **(b)** Scatter graph of study visit HbA1c and historic HbA1c mean (n=153). Spearman's rho = 0.72, p<0.0001. Low C-peptide group (n=86) shown in blue and preserved C-peptide group (n=67) in orange. **(c)** Boxplot showing similar study visit HbA1c (n=153) vs historic HbA1c mean (n=153), p=0.1.

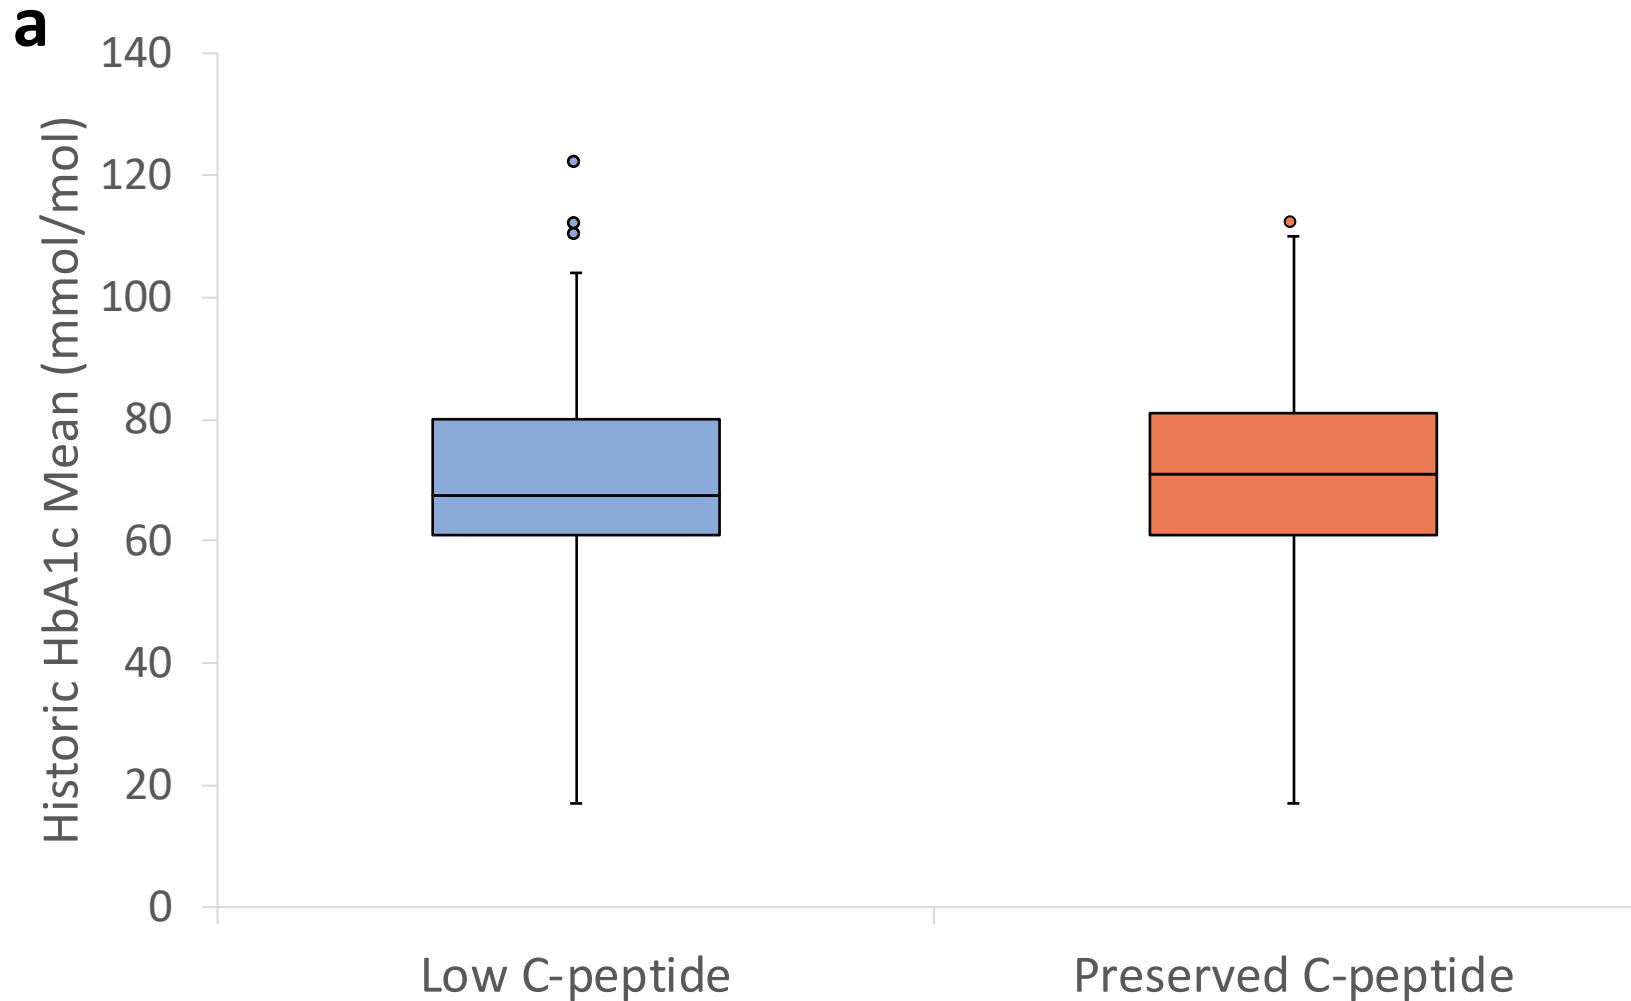

**Fig. S4** - Historic HbA1c mean analysis **(a)** Boxplot showing similar historic HbA1c mean in low (n=86) vs preserved (n=67) C-peptide group,  $p=0.4$ . **(b)** Scatter graph of study visit HbA1c and historic HbA1c mean (n=153). Spearman's  $\rho = 0.72$ ,  $p<0.0001$ . Low C-peptide group (n=86) shown in blue and preserved C-peptide group (n=67) in orange. **(c)** Boxplot showing similar study visit HbA1c (n=153) vs historic HbA1c mean (n=153),  $p=0.1$ .

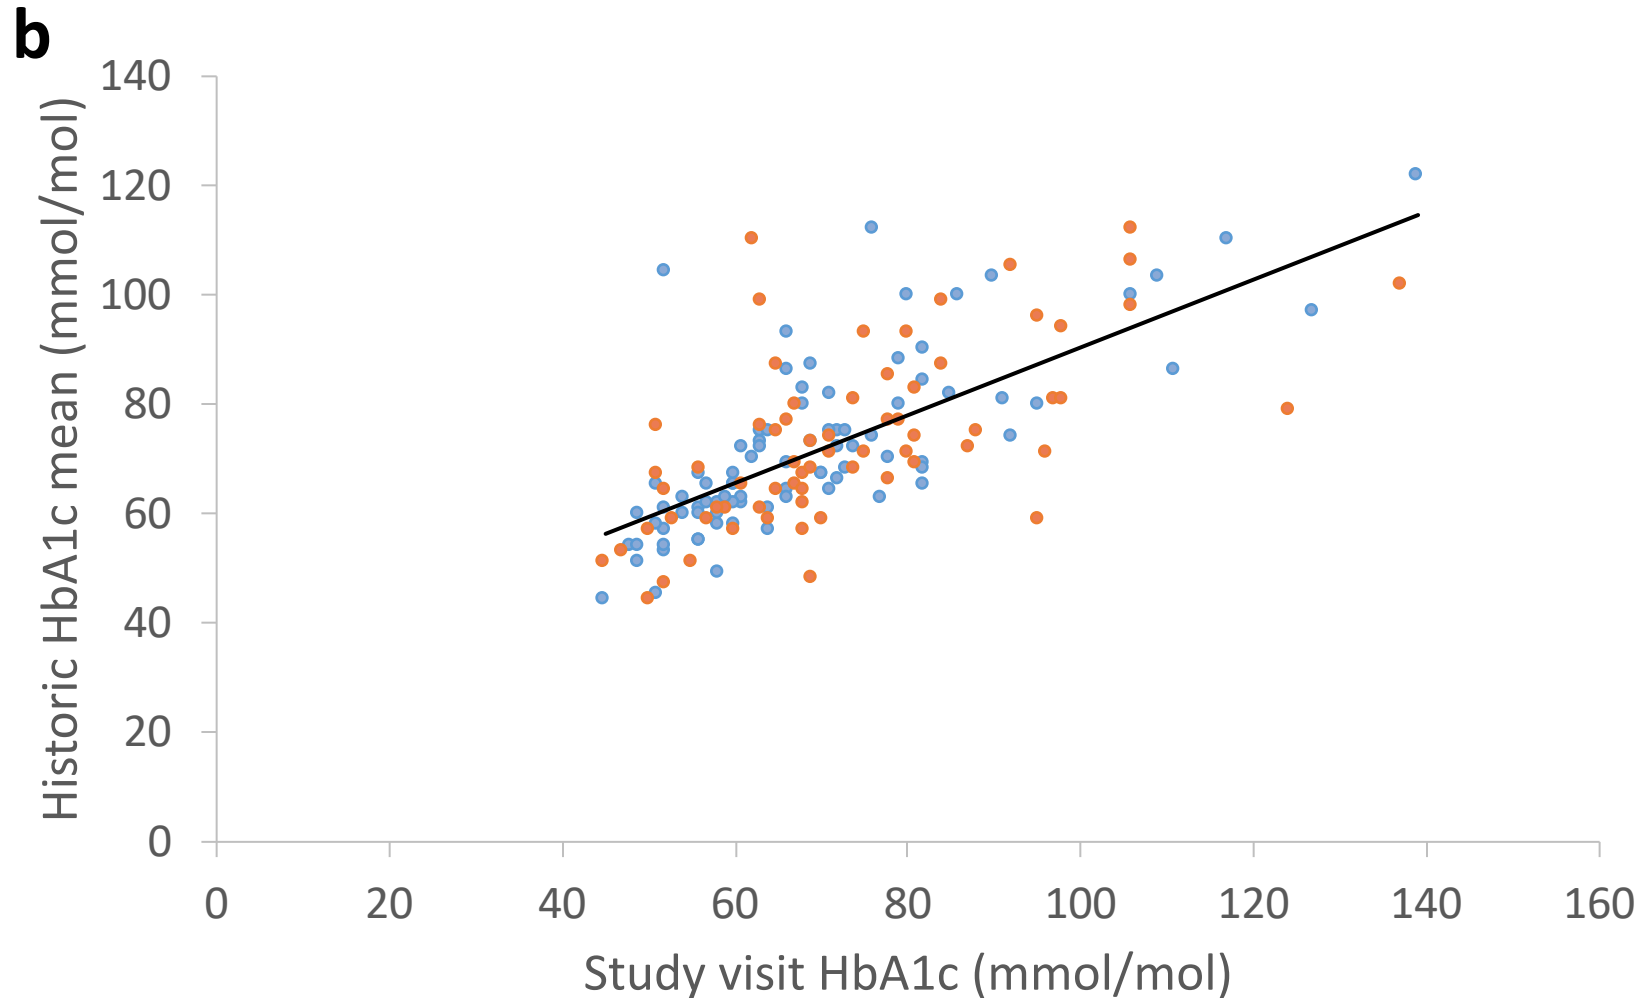

**Fig. S4** - Historic HbA1c mean analysis **(a)** Boxplot showing similar historic HbA1c mean in low (n=86) vs preserved (n=67) C-peptide group, p=0.4. **(b)** Scatter graph of study visit HbA1c and historic HbA1c mean (n=153). Spearman's rho = 0.72, p<0.0001. Low C-peptide group (n=86) shown in blue and preserved C-peptide group (n=67) in orange. **(c)** Boxplot showing similar study visit HbA1c (n=153) vs historic HbA1c mean (n=153), p=0.1.

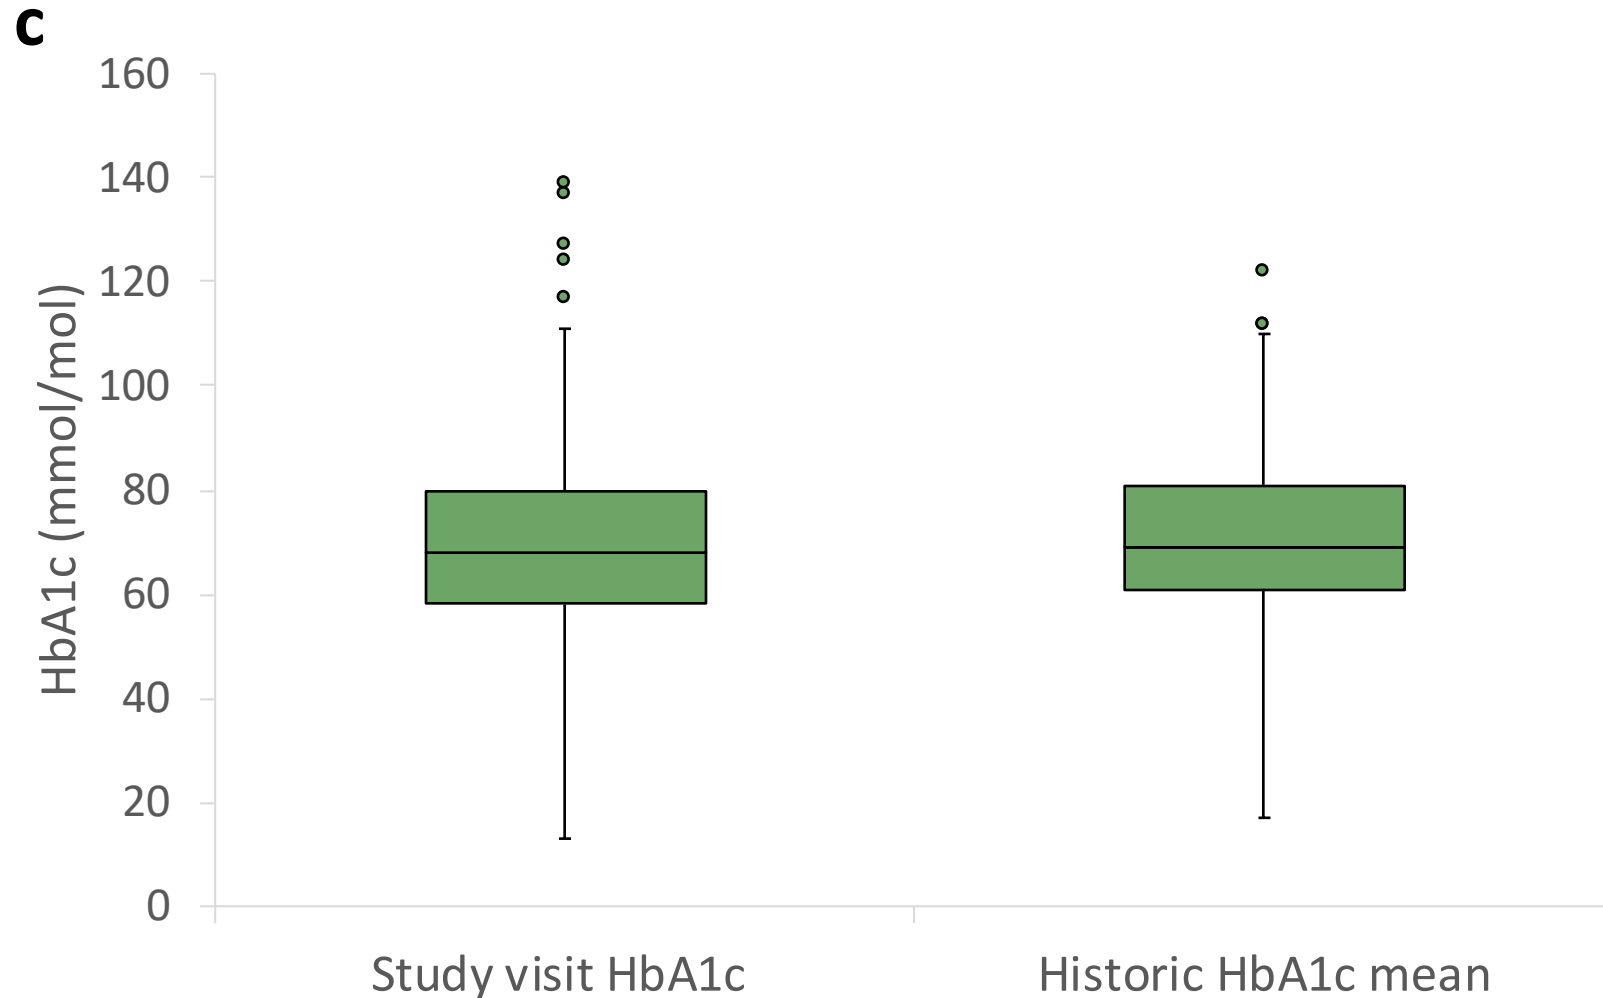

**Fig. S5** – Boxplot of daily insulin dose by C-peptide group. Insulin dose was lower in the preserved C-peptide group (n=70) vs the low (n=151) group, p=0.01. Including outliers.

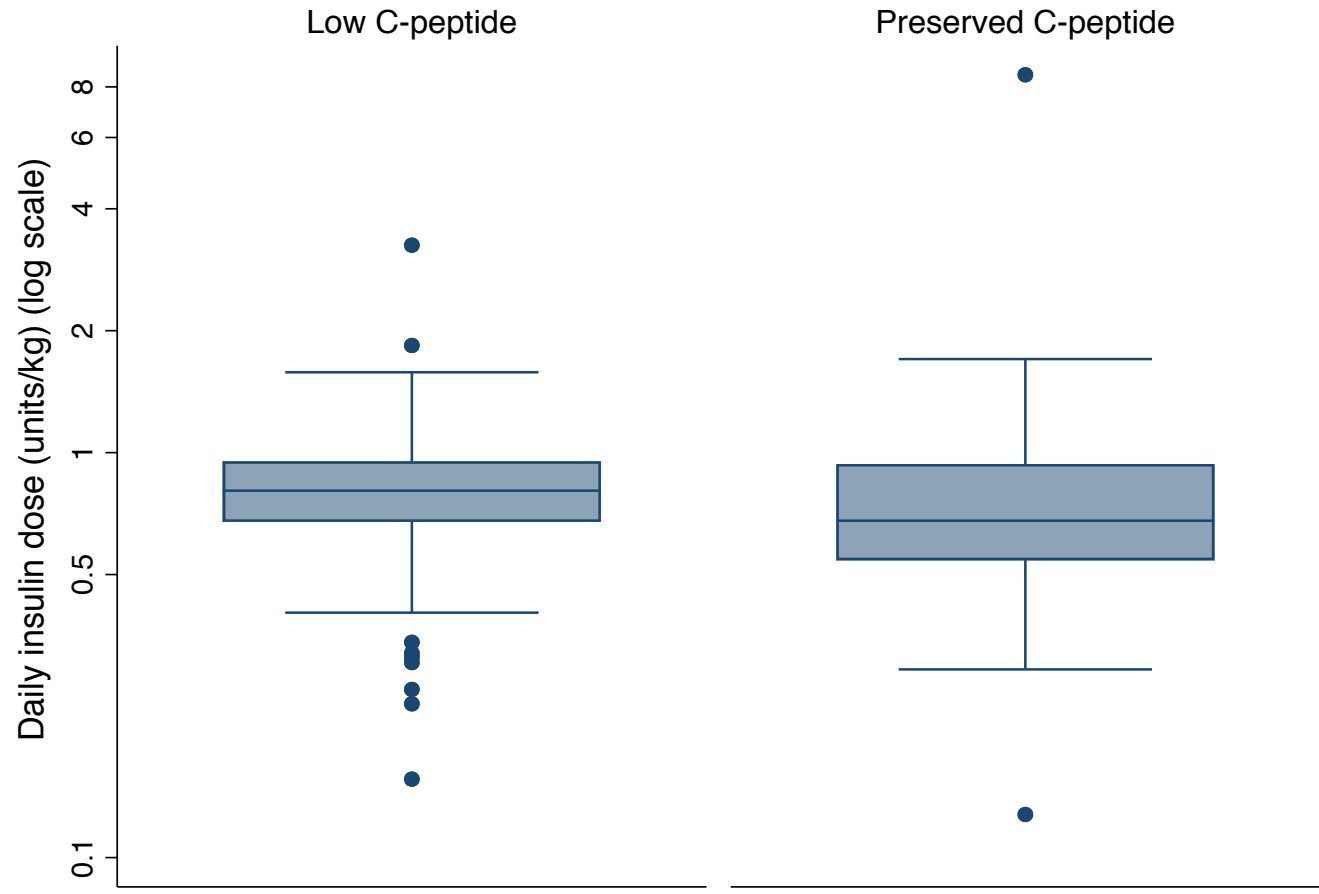



**Table S2** - Complication analysis cohort characteristics. Values reported as n (%) or median (IQR). *p* values are Mann Whitney U unless otherwise stated, \* denotes Chi<sup>2</sup>.

| <b>Characteristics</b>                  | <b>Low C-peptide</b> | <b>Preserved C-peptide</b> | <b><i>p</i> value</b> |
|-----------------------------------------|----------------------|----------------------------|-----------------------|
| <b>No. of participants (%)</b>          | 81                   | 59                         | -                     |
| <b>No. Male (%)</b>                     | 46 (57)              | 23 (39)                    | 0.04*                 |
| <b>Age at diagnosis (years)</b>         | 10.9 (5.2 15.2)      | 17.0 (12.5, 23.8)          | <0.0001               |
| <b>Age at recruitment (years)</b>       | 34.4 (23.2, 47.9)    | 34.1 (26.1, 43.6)          | 0.8                   |
| <b>BMI (kg/m<sup>2</sup>)</b>           | 24.5 (22.5, 27.2)    | 25.5 (22.5, 27.3)          | 0.6                   |
| <b>BMI standard deviation score</b>     | 1.0 (0.4, 1.5)       | 1.0 (0.3, 1.5)             | 0.9                   |
| <b>Duration of diabetes (years)</b>     | 21.3 (12.4, 37.8)    | 14.1 (7.8, 23.2)           | 0.001                 |
| <b>C-peptide (pmol/l)</b>               | <3 (<3, 4)           | 135 (57, 314)              | <0.0001               |
| <b>HbA1c (mmol/mol)</b>                 | 66 (58, 78)          | 69 (63, 81)                | 0.08                  |
| <b>HbA1c (%)</b>                        | 8.2 (7.5, 9.3)       | 8.5 (7.9, 9.6)             | 0.08                  |
| <b>Insulin dose in 24 h (U/kg)</b>      | 0.75 (0.59, 0.88)    | 0.67 (0.54, 0.92)          | 0.2                   |
| <b>No. in retinopathy analysis</b>      | 74                   | 56                         | -                     |
| <b>No. in microalbuminuria analysis</b> | 69                   | 51                         | -                     |

**Fig. S6** – Rates of retinopathy and microalbuminuria by C-peptide group. Proportion of C-peptide group with retinopathy in blue; background in dark blue, pre-proliferative in medium blue, proliferative in light blue. Proportion with retinopathy was similar in the low (n=55/74) vs preserved C-peptide group (n=37/56), p=0.3. Proportion of C-peptide group with microalbuminuria (green); similar in low (n=16/69) and preserved (n=10/51) C-peptide groups, p=0.6.

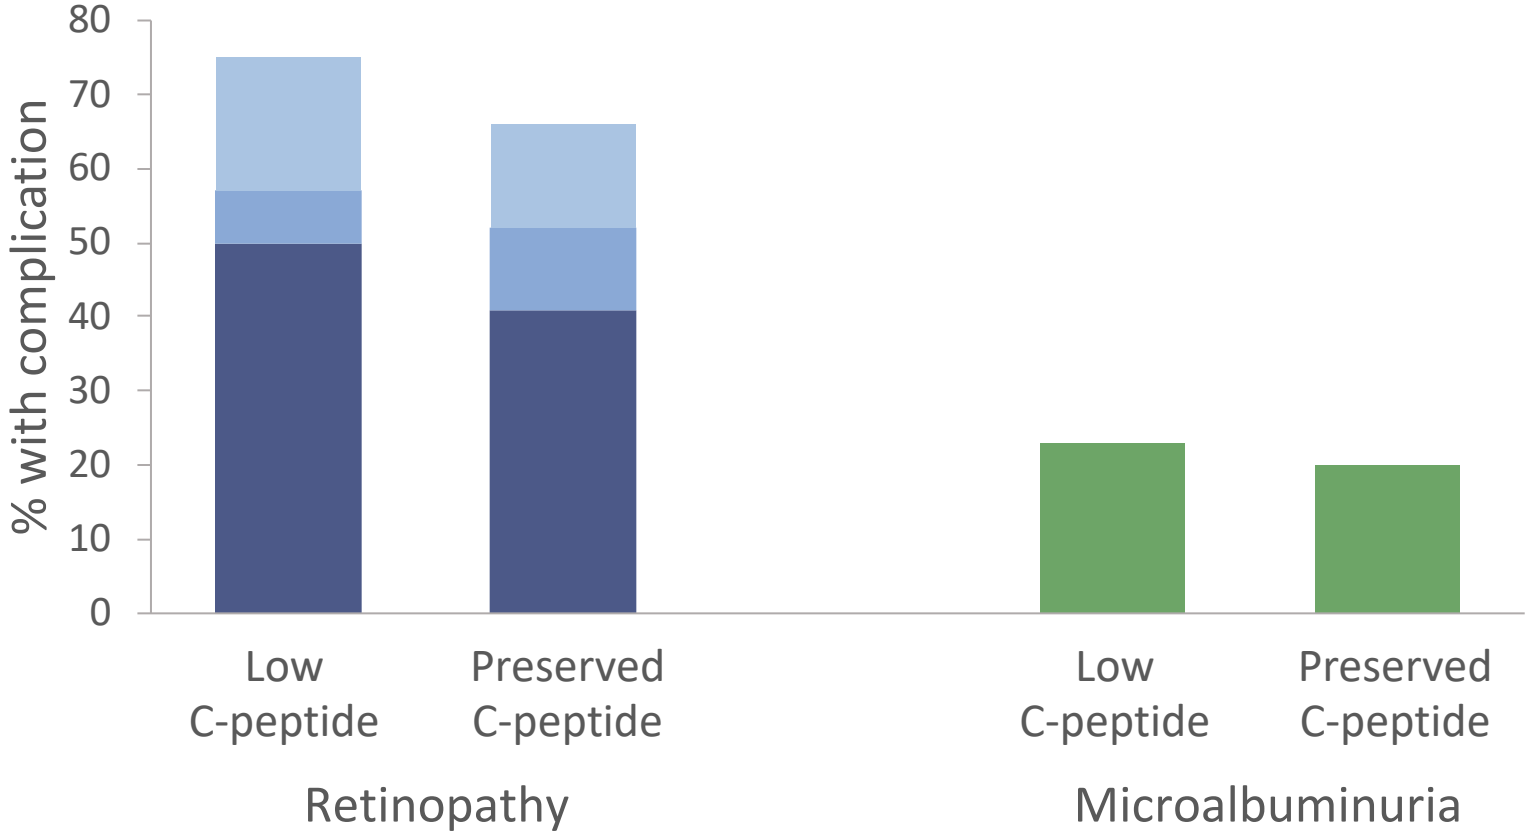

Supplement: DME-36-1092-s001.pdf [file DME-36-1092-s001.pdf]
